# Supplementary material for: Spec2Vec: Improved mass spectral similarity scoring through learning of structural relationships
Source: PubMed Central journal article supplement (PMC7909622; doi:10.1371/journal.pcbi.1008724), 2021-02-16
Supplement: pcbi.1008724.s005.pdf [file pcbi.1008724.s005.pdf]

## Supporting Information S5 – Spec2Vec in GNPS environment

For main article “Spec2Vec: Improved mass spectral similarity scoring through learning of structural relationships”, *Florian Huber, Lars Ridder, Stefan Verhoeven, Jurriaan H. Spaaks, Faruk Diblen, Simon Rogers, Justin J.J. van der Hooft*.

### Spec2Vec in GNPS environment

To start making Spec2Vec available within the GNPS [1] environment (<https://gnps.ucsd.edu>), an option to calculate Spec2Vec scores of positive ionisation mode classical and feature-based molecular networks has been added to GNPS release 27. There is a link “Network with Spec2vec” that reads in the spectral mgf file and graphml file of the molecular networking job and from which you can start the Spec2Vec analysis. The default GNPS-Spec2Vec analysis will take the spectral data from the molecular network and use a pre-trained model to calculate Spec2Vec similarity scores. Subsequently, all cosine pairs and Spec2Vec pairs below a user-provided threshold score (0.7 by default) are deleted prior to reconstructing the Spec2Vec-based spectral network (with by default a topK of 100 - a parameter that breaks up the larger molecular families to prevent hairball formation ).

The resulting Spec2Vec-based spectral network can be visualized directly in the browser - or on your local computer by downloading the graphml file. In the future, we envision to also include the option to calculate negative ionisation mode data, library matching based on Spec2Vec scores, among other ideas.

Here below are links to positive ionisation mode examples from the MolNetEnhancer [2] molecular networking jobs and the example feature-based molecular networking data from GNPS:

#### *Feature-based Molecular Networking*

GNPS FBMN example data (subset of American Gut Project samples of volunteers consuming higher and lower amounts of vegetables and fruit)

- Molecular Networking job release V27:  
<https://gnps.ucsd.edu/ProteoSAFe/status.jsp?task=470836933ab047628f11f903af873b0a>
- GNPS-Spec2Vec analysis:  
<https://gnps.ucsd.edu/ProteoSAFe/status.jsp?task=b4b582fdd4844adeaf601bf76cc0d72f>

#### *Euphorbia* dataset:

- Molecular Networking job release V27:

<https://gnps.ucsd.edu/ProteoSAFe/status.jsp?task=a3ca5a96f62b4a0a9043a9d2bb9625bb>

- GNPS-Spec2Vec analysis:  
<https://gnps.ucsd.edu/ProteoSAFe/status.jsp?task=b2cb48a96be84efb86a459612546ff01>

### *Classical Molecular Networking*

*Streptomyces* and *Salinispora* dataset:

- Molecular Networking job release V27:  
<https://gnps.ucsd.edu/ProteoSAFe/status.jsp?task=8e98a739c59a45689f2cb891418402c4>
- GNPS-Spec2Vec analysis:  
<https://gnps.ucsd.edu/ProteoSAFe/status.jsp?task=62361a03cb634f86ad5eacf55834d1cc>

*Photorhabdus* and *Xenorhabdus* dataset:

- Molecular Networking job release V27:  
<https://gnps.ucsd.edu/ProteoSAFe/status.jsp?task=e9e8edc75ae84bbb9034d8ab5ec956ec>
- GNPS-Spec2Vec analysis:  
<https://gnps.ucsd.edu/ProteoSAFe/status.jsp?task=fa96df30b52b4824ad6076bc52ca358a>

## References

1. Wang M, Carver JJ, Phelan VV, Sanchez LM, Garg N, Peng Y, et al. Sharing and community curation of mass spectrometry data with GNPS. *Nat Biotechnol.* 2016;34: 828–837. doi:10.1038/nbt.3597
2. Ernst M, Kang KB, Caraballo-Rodríguez AM, Nothias L-F, Wandy J, Chen C, et al. MolNetEnhancer: Enhanced Molecular Networks by Integrating Metabolome Mining and Annotation Tools. *Metabolites.* 2019;9: 144. doi:10.3390/metabo9070144
